# Supplementary material for: A decagallane(6) cluster Ga10[Si(CMe3)3]6 with an unprecedented structure
Source: Royal Society of Chemistry journal article supplement (doi:10.1039/b802959h), 2008-01-01
Supplement: b802959h.pdf [file b802959h.pdf]

Results of DFT Calculations on **12a**:

**Functional: BP86**

**Base set: def-Sv(P)**

**Programms: Turbomole und Gaussian 03**

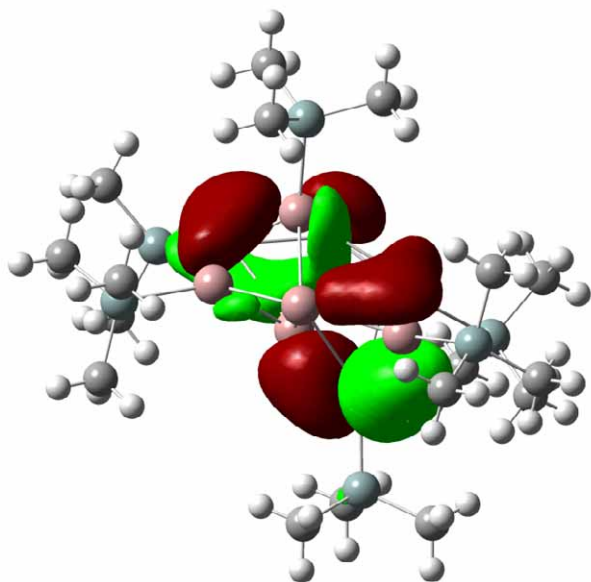

HOMO (-0.172 H)

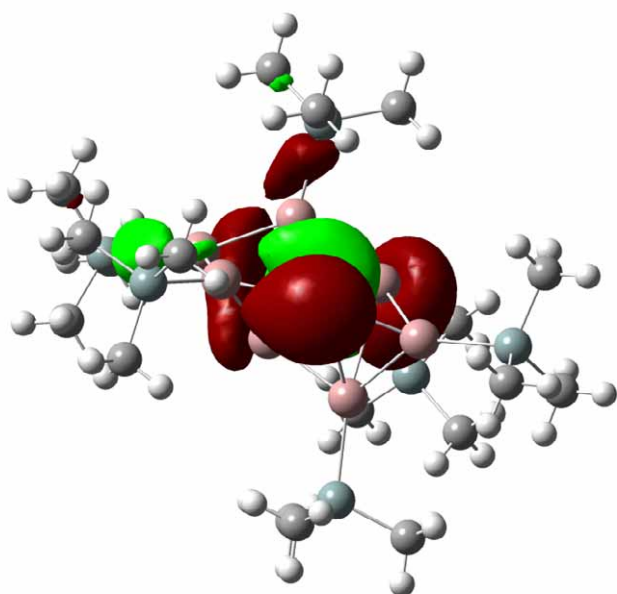

HOMO -1 (-0.188 H)

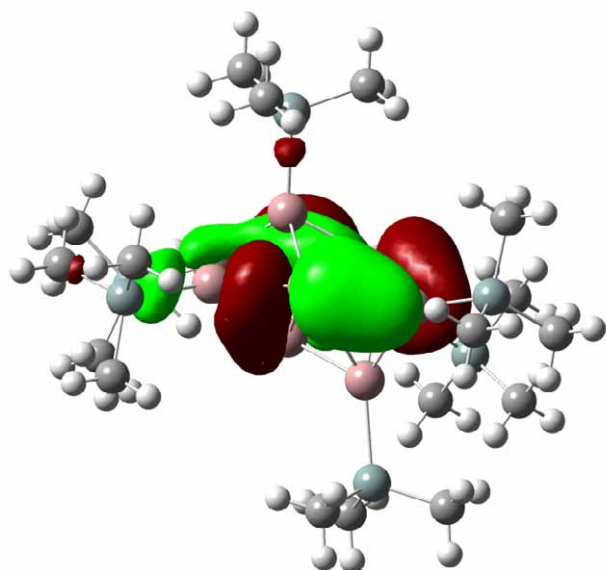

HOMO -2 ( -0.191 H)

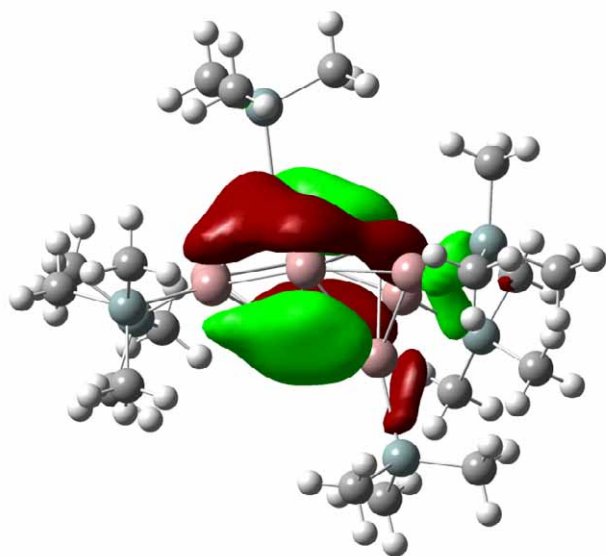

HOMO -3 (-0.199 H)

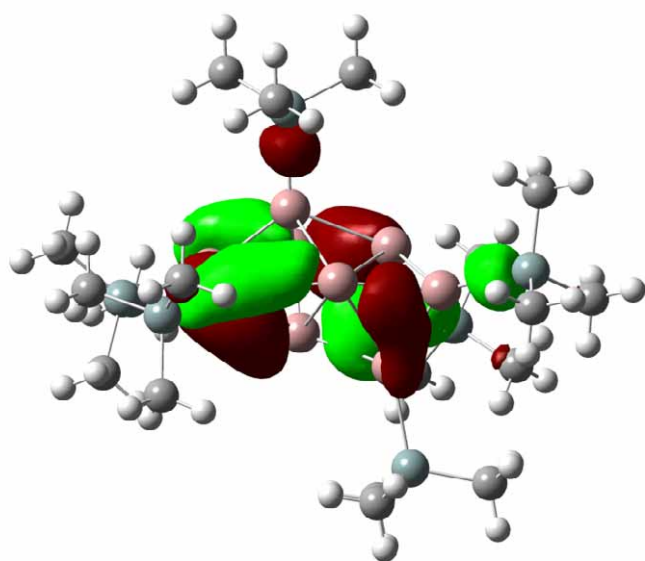

HOMO -4 (-0.201 H)

**Table**

| SEN           | 2-center SEN |                     | 2-center SEN  |                     |
|---------------|--------------|---------------------|---------------|---------------------|
|               |              |                     |               |                     |
| figures       | Ga(3)-Ga(4)  | 1.30                | Ga(1)-Ga(9)   | 1.41                |
|               | Ga(2)-Ga(3)  | 1.43                | Ga(1)-Ga(8)   | 1.52                |
|               | Ga(1)-Ga(2)  | 0.89                | Ga(5)-Ga(8)   | 1.52                |
|               | Ga(1)-Ga(5)  | 0.64                | Ga(7)-Ga(10)  | 1.55                |
|               | Ga(4)-Ga(5)  | 1.42                | Ga(7)-Ga(8)   | 0.79                |
|               | Ga(4)-Ga(6)  | 1.41                | Ga(1)-Ga(10)  | 1.05                |
|               | Ga(3)-Ga(6)  | 1.21                | Ga(9)-Ga(10)  | 1.51                |
|               | Ga(1)-Ga(6)  | 0.95                | Ga(6)-Ga(7)   | 0.91                |
|               | Ga(5)-Ga(6)  | 1.43                |               |                     |
|               | Ga(2)-Ga(6)  | 0.91                |               |                     |
|               | Ga(4)-Ga(7)  | 1.34                | Ga(3)-Si(1)   | 1.18                |
|               | Ga(3)-Ga(7)  | 1.23                | Ga(4)-Si(2)   | 1.15                |
|               | Ga(2)-Ga(7)  | 0.82                | Ga(6)-Si(3)   | 0.99                |
|               | Ga(1)-Ga(7)  | 1.07                | Ga(8)-Si(4)   | 1.21                |
|               | Ga(5)-Ga(7)  | 1.42                | Ga(9)-Si(5)   | 1.19                |
|               | Ga(2)-Ga(9)  | 1.59                | Ga(10)-Si(6)  | 1.17                |
|               | <i>n-o-p</i> | <i>3-center SEN</i> | <i>n-o-p</i>  | <i>3-center SEN</i> |
|               | <i>1-2-6</i> | <i>0.40</i>         | <i>2-3-6</i>  | <i>0.42</i>         |
|               | <i>1-2-7</i> | <i>0.30</i>         | <i>2-3-7</i>  | <i>0.40</i>         |
|               | <i>1-2-9</i> | <i>0.43</i>         | <i>2-7-10</i> | <i>0.36</i>         |
| <i>1-5-8</i>  | <i>0.33</i>  | <i>2-9-10</i>       | <i>0.41</i>   |                     |
| <i>1-6-7</i>  | <i>0.44</i>  | <i>3-4-6</i>        | <i>0.45</i>   |                     |
| <i>1-7-8</i>  | <i>0.36</i>  | <i>3-4-7</i>        | <i>0.47</i>   |                     |
| <i>1-8-10</i> | <i>0.33</i>  | <i>3-6-7</i>        | <i>0.31</i>   |                     |
| <i>1-9-10</i> | <i>0.47</i>  | <i>5-7-8</i>        | <i>0.33</i>   |                     |
| <i>1-10-7</i> | <i>0.44</i>  | <i>8-7-10</i>       | <i>0.30</i>   |                     |

SENs for **12a** as resulting from a Ahlrichs-Heinzmann population analysis; 2-center and 3-center SEN  $Ga(n)Ga(o)Ga(p)$  ( $\geq 0.30$ ) (numbering of atoms and bonds acc. to 1 and 3).
